# Supplementary material for: Synthesis of a Novel Adsorbent Based on Chitosan Magnetite Nanoparticles for the High Sorption of Cr (VI) Ions: A Study of Photocatalysis and Recovery on Tannery Effluents
Source: MDPI journal article supplement (doi:10.3390/catal12070678), 2022-06-21
Supplement: s1 [file catalysts-1748367-supplementary.pdf › catalysts-1748367-supplementary.pdf]

# Synthesis of a Novel Adsorbent Based on Chitosan Magnetite Nanoparticles for the High Sorption of Cr (VI) ions: A Study of Photocatalysis and Recovery on Tannery Effluents

Maram H. Zahra <sup>1</sup>, Mohammed F. Hamza <sup>2,3,\*</sup>, Gehan El-Habibi <sup>4</sup>, Adel A.-H. Abdel-Rahman <sup>4,\*</sup>, Hamed I. Mira <sup>3</sup>, Yuezhou Wei <sup>2,5,\*</sup>, Saad H. Alotaibi <sup>6</sup>, Hamada H. Amer <sup>6</sup>, Adel E.-S. Goda <sup>7</sup> and Nora A. Hamad <sup>4</sup>

<sup>1</sup> Research Core for Interdisciplinary Sciences, Graduate School of Natural Science and Technology, Okayama University, Tsushima naka, Kita, Okayama 700-8530, Japan; maram@okayama-u.ac.jp

<sup>2</sup> School of Nuclear Science and Technology, University of South China, Hengyang 421001, China

<sup>3</sup> Nuclear Materials Authority, POB 530, El-Maadi, Cairo 11728, Egypt; hamedmira@yahoo.com

<sup>4</sup> Chemistry Department, Faculty of Science, Menofia University, Shebin El-Kom 32511, Egypt; gehanelhabibi2255@yahoo.com (G.E.-H.); nhamad059@gmail.com (N.A.H.)

<sup>5</sup> School of Nuclear Science and Engineering, Shanghai Jiao Tong University, Shanghai 200240, China

<sup>6</sup> Department of Chemistry, Turabah University College, Taif University, Taif 21944, Saudi Arabia; s.alosaimi@tu.edu.sa (S.H.A.); h.amer@tu.edu.sa (H.H.A.)

<sup>7</sup> Tanta Higher Institute of Engineering and Technology, Tanta 31739, Egypt; adelgoda1969@gmail.com

\* Correspondence: m\_fouda21@hotmail.com (M.F.H.); adelnassar63@yahoo.com (A.A.-H.A.-R.); yzwei@sjtu.edu.cn (Y.W.); Tel.: +20-111-668-1228 (M.F.H.); +2-01221678094 (A.A.-H.A.-R.); +86-771-322-4990 (Y.W.)

---

**Table S1.** Elemental analysis of MCH and MC-TDPD sorbents.

| <b>Sorbent</b> | <b>C</b>   | <b>N</b>   | <b>H</b>   | <b>O</b>   | <b>S</b>   |
|----------------|------------|------------|------------|------------|------------|
|                | <b>[%]</b> | <b>[%]</b> | <b>[%]</b> | <b>[%]</b> | <b>[%]</b> |
| <u>MCH</u>     | 34.65      | 3.98       | 4.97       | 27.14      |            |
| <u>MC-TDPD</u> | 37.09      | 5.63       | 5.15       | 32.96      | 1.11       |

**Table S2.** Modeling of uptake kinetics [1-3].

| Model | Equation                                                                                                                                                                                                                                                                                | Parameters                                                                                                                                               | Ref. |
|-------|-----------------------------------------------------------------------------------------------------------------------------------------------------------------------------------------------------------------------------------------------------------------------------------------|----------------------------------------------------------------------------------------------------------------------------------------------------------|------|
| PFORE | $q(t) = q_{eq,1}(1 - e^{-k_1 t})$                                                                                                                                                                                                                                                       | $q_{eq,2}$ (mmol g <sup>-1</sup> ): sorption capacity at equilibrium<br>$k_1$ (min <sup>-1</sup> ): apparent rate constant of PFORE                      | [2]  |
| PSORE | $q(t) = \frac{q_{eq,2}^2 k_2 t}{1 + k_2 q_{eq,2} t}$                                                                                                                                                                                                                                    | $q_{eq,2}$ (mmol g <sup>-1</sup> ): sorption capacity at equilibrium<br>$k_2$ (g mmol <sup>-1</sup> min <sup>-1</sup> ): apparent rate constant of PSORE | [2]  |
| RIDE  | $\frac{q(t)}{q_{eq}} = 1 - \sum_{n=1}^{\infty} \frac{6\alpha(\alpha+1)\exp\left(\frac{-D_e q_n^2}{r^2} t\right)}{9 + 9\alpha + q_n^2 \alpha^2}$<br>With $q_n$ being the non-zero roots of<br>$\tan q_n = \frac{3 q_n}{3 + \alpha q_n^2}$ and $\frac{m q}{V C_0} = \frac{1}{1 + \alpha}$ | $D_e$ (m <sup>2</sup> min <sup>-1</sup> ) : Effective diffusivity coefficient                                                                            | [1]  |

(m (g): mass of sorbent; V (L): volume of solution; C<sub>0</sub> (mmol L<sup>-1</sup>): initial concentration of the solution).

**Table S3.** Modeling of sorption isotherms [4,5].

| Model      | Equation                                                             | Parameters                                                                                                                             | Ref. |
|------------|----------------------------------------------------------------------|----------------------------------------------------------------------------------------------------------------------------------------|------|
| Langmuir   | $q_{eq} = \frac{q_{m,L}C_{eq}}{1 + b_L C_{eq}}$                      | $q_{m,L}$ (mmol g <sup>-1</sup> ): Sorption capacity at saturation of monolayer<br>$b_L$ (L mmol <sup>-1</sup> ): Affinity coefficient | [5]  |
| Freundlich | $q_{eq} = k_F C_{eq}^{1/n_F}$                                        | $k_F$ and $n_F$ : empirical parameters of Freundlich equation                                                                          | [4]  |
| Sips       | $q_{eq} = \frac{q_{m,S} b_S C_{eq}^{1/n_S}}{1 + b_S C_{eq}^{1/n_S}}$ | $q_{m,L}$ , $b_S$ and $n_S$ : empirical parameters of Sips equation (based on Langmuir and Freundlich equations)                       | [5]  |

Akaike Information Criterion, AIC:

$$AIC = N \ln \left( \frac{\sum_{i=0}^N (y_{i,exp.} - y_{i,model})^2}{N} \right) + 2N_p + \frac{2N_p(N_p + 1)}{N - N_p - 1}$$

Where N is the number of experimental points,  $N_p$  the number of model parameters,  $y_{i,exp.}$  and  $y_{i,model}$  the experimental and calculated values of the tested variable.

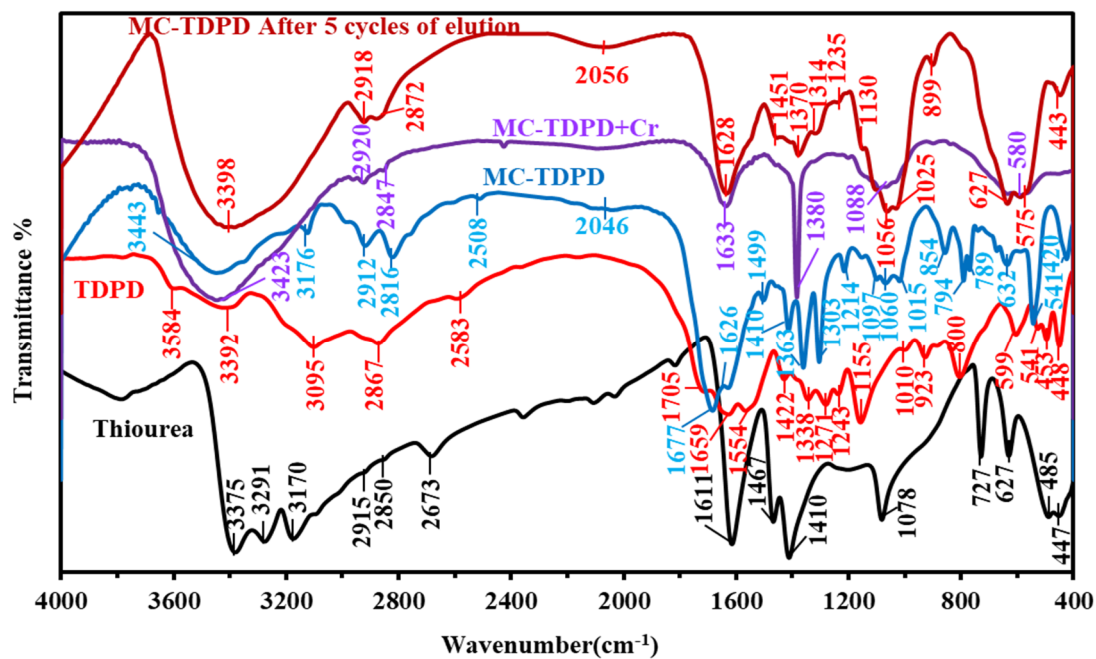

**Figure S1.** FTIR spectra of thiourea, TDPD, MC-TDPD, after sorption and after five cycles of sorption desorption.

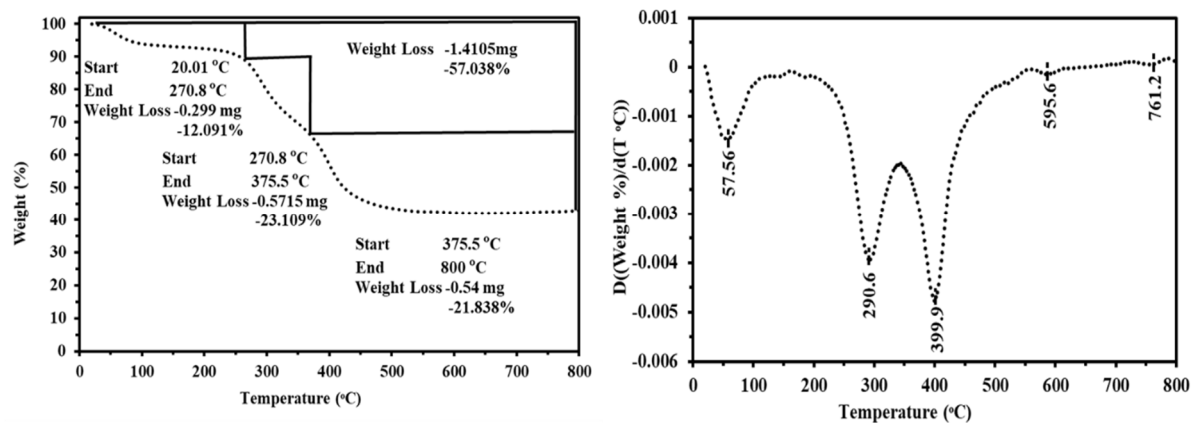

**Figure S2.** TGA and DrTG analyses of MC-TDPD sorbent T: 23-800 °C.

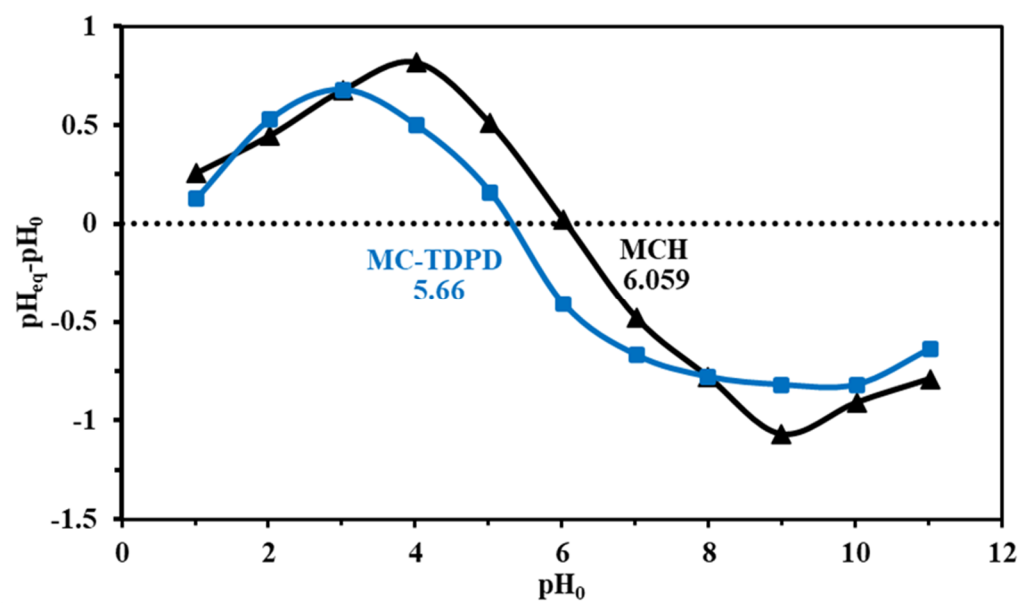

Figure S3. pHpzc of the MCH and MC-TDPD sorbents in range of pH 1-14.

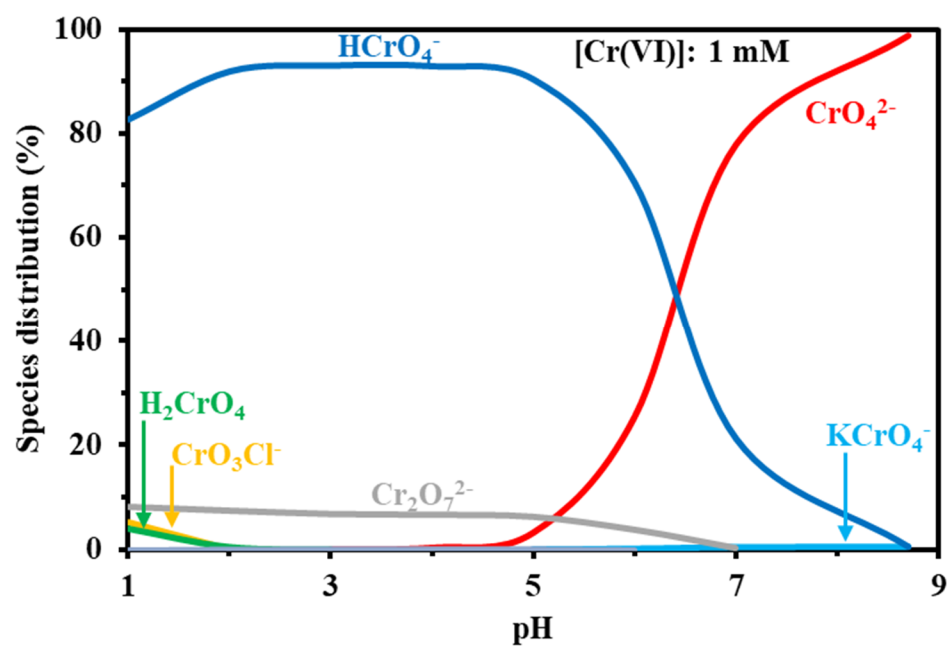

Figure S4. Cr(VI) species at pH 1-9.



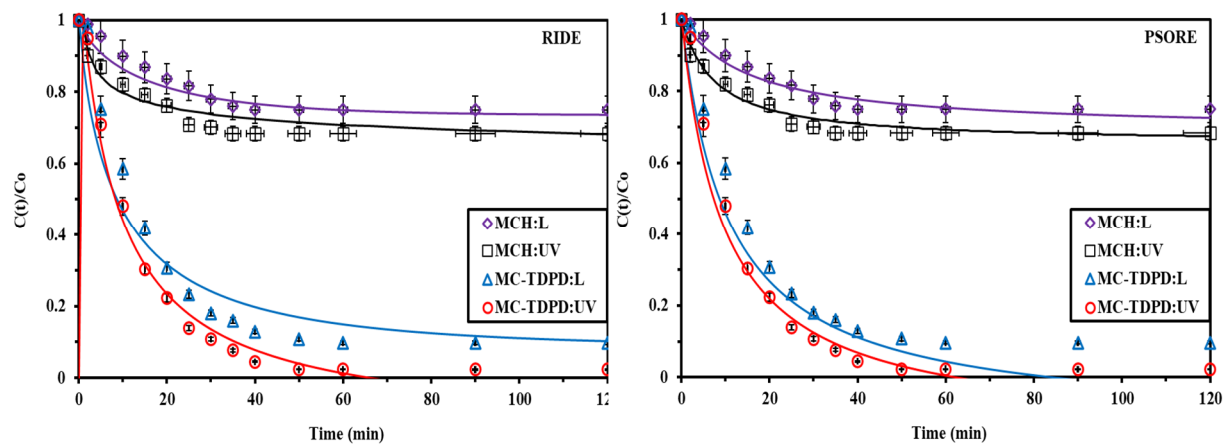

**Figure S5.** Cr(VI) uptake kinetics using MCH, MC-TDPD in light and UV condition- Modeling with the PSORE and RIDE.

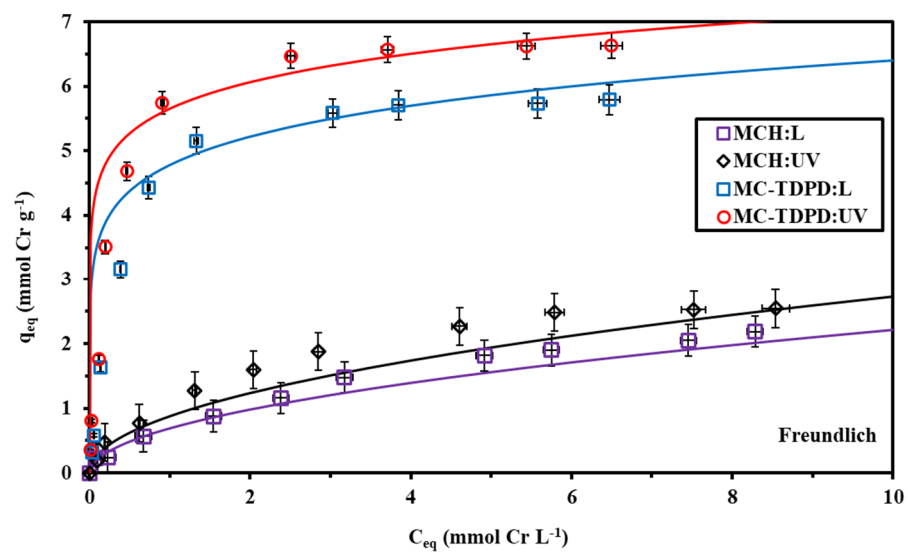

**Figure S6.** Cr(VI) sorption isotherms using MCH, MC-TDPD in light and UV condition- with the Freundlich equations. .

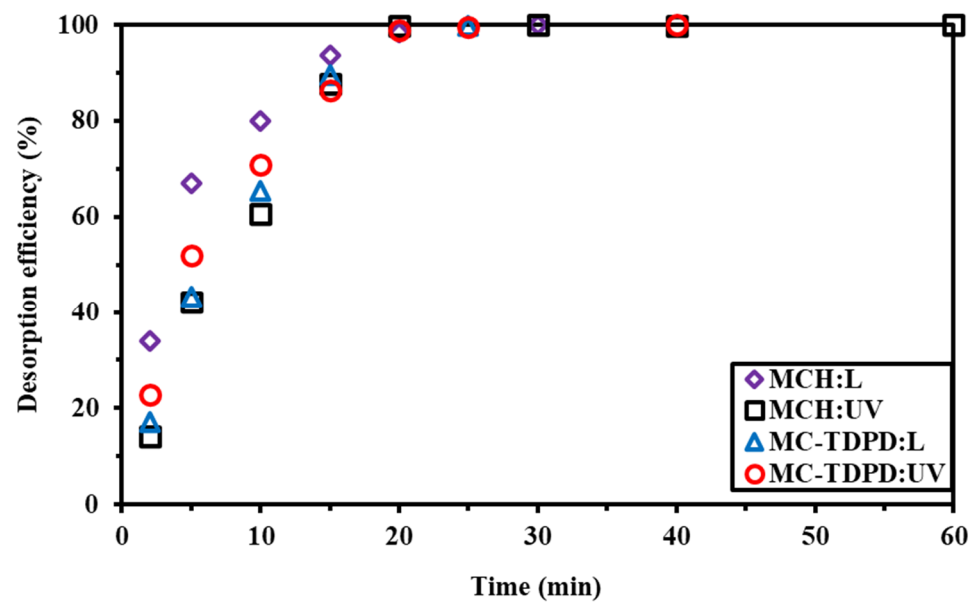

**Figure S7.** Desorption kinetics of MCH:L, MCH:UV, MC-TDPD:L and MC-TDPD:UV sorbents.

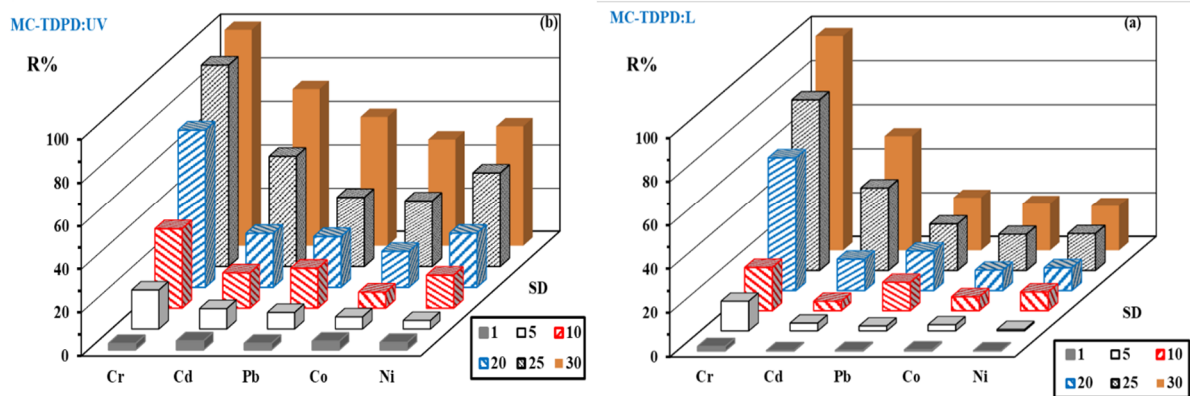

**Figure S8.** Recovery efficient of MC-TDPD at visible light (a) and Ultraviolet (b).

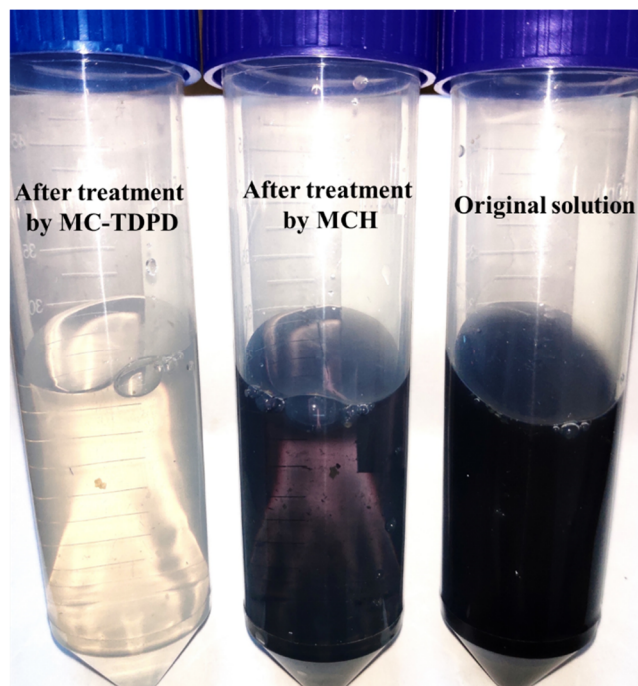

**Figure S9.** Removal efficient of Cr(VI) using MCH and MC-TDPD

---

## References

1. Crank, J. *The Mathematics of Diffusion*, 2nd ed.; Oxford University Press: Oxford, UK, 1975; p. 414.
2. Ho, Y.S.; McKay, G. Pseudo-second order model for sorption processes. *Process Biochem.* **1999**, *34*, 451–465. [https://doi.org/10.1016/S0032-9592\(98\)00112-5](https://doi.org/10.1016/S0032-9592(98)00112-5).
3. Zhang, R.; Leiviska, T. Surface modification of pine bark with quaternary ammonium groups and its use for vanadium removal. *Chem. Eng. J.* **2020**, *385*, 123967. <https://doi.org/10.1016/j.cej.2019.123967>.
4. Freundlich, H.M.F. Über die adsorption in lasungen. *Z. Phys. Chem.* **1906**, *57*, 385–470.
5. Tien, C. *Adsorption Calculations and Modeling*; Butterworth-Heinemann: Newton, MA, USA, 1994; p. 243.
